# Supplementary material for: Genomic regions and genes related to inter-population differences in body size in the ground beetle Carabus japonicus
Source: PubMed Central journal article supplement (PMC5552851; doi:10.1038/s41598-017-08362-7), 2017-08-10
Supplement: 41598_2017_8362_MOESM1_ESM.pdf [file 41598_2017_8362_MOESM1_ESM.pdf]

## Supplementary Information

### **Genomic regions and genes related to inter-population differences in body size in the ground beetle *Carabus japonicus***

Ryohei Komurai<sup>1</sup>, Tomochika Fujisawa<sup>1</sup>, Yutaka Okuzaki<sup>2</sup> & Teiji Sota<sup>1\*</sup>

<sup>1</sup>Department of Zoology, Graduate School of Science, Kyoto University, Sakyo, Kyoto 606-8502, Japan. <sup>2</sup>Field Science Center for Northern Biosphere, Hokkaido University, Kita, Sapporo, 060-0811, Japan.

Table S1. Body dimensions of F2 individuals. (a) Original  $\log_{10}$ -transformed values. (b) Values of male dimensions adjusted for sexual differences are given.

(a) Original data

| ID     | sex | BL     | HW     | HL     | TW     | TL     | EW     | EL     | GM     |
|--------|-----|--------|--------|--------|--------|--------|--------|--------|--------|
| F07_2  | F   | 1.4199 | 0.6431 | 0.5399 | 0.8302 | 0.7820 | 1.0033 | 1.2247 | 0.8372 |
| F07_37 | F   | 1.4244 | 0.6640 | 0.5860 | 0.8641 | 0.7870 | 1.0117 | 1.2199 | 0.8555 |
| F07_45 | F   | 1.4259 | 0.6497 | 0.5431 | 0.8488 | 0.7896 | 1.0063 | 1.2307 | 0.8447 |
| F07_60 | F   | 1.4340 | 0.6721 | 0.5748 | 0.8774 | 0.7877 | 1.0235 | 1.2374 | 0.8622 |
| F07_65 | F   | 1.3940 | 0.6385 | 0.5383 | 0.8156 | 0.7564 | 0.9812 | 1.1935 | 0.8206 |
| F07_69 | F   | 1.3820 | 0.6205 | 0.5676 | 0.7989 | 0.7313 | 0.9576 | 1.1766 | 0.8088 |
| F07_9  | F   | 1.4341 | 0.6709 | 0.6256 | 0.8573 | 0.7827 | 1.0202 | 1.2275 | 0.8640 |
| F08_41 | F   | 1.4219 | 0.6564 | 0.6044 | 0.8733 | 0.7834 | 1.0119 | 1.2128 | 0.8570 |
| F08_42 | F   | 1.4198 | 0.6650 | 0.5825 | 0.8679 | 0.7718 | 1.0144 | 1.2189 | 0.8534 |
| F08_44 | F   | 1.4320 | 0.6739 | 0.5806 | 0.8760 | 0.7820 | 1.0208 | 1.235  | 0.8614 |
| F08_59 | F   | 1.4138 | 0.6596 | 0.5717 | 0.8708 | 0.7644 | 1.0148 | 1.2145 | 0.8493 |
| F08_62 | F   | 1.4145 | 0.6699 | 0.5785 | 0.8645 | 0.7704 | 0.9964 | 1.2119 | 0.8486 |
| F08_63 | F   | 1.4357 | 0.6755 | 0.6378 | 0.8821 | 0.7832 | 1.0198 | 1.2268 | 0.8709 |
| F08_71 | F   | 1.4157 | 0.6612 | 0.6199 | 0.8671 | 0.7569 | 1.0275 | 1.2085 | 0.8569 |
| F08_74 | F   | 1.4266 | 0.6739 | 0.6137 | 0.8971 | 0.7912 | 1.01   | 1.2152 | 0.8669 |
| F08_76 | F   | 1.4175 | 0.6668 | 0.5706 | 0.8831 | 0.7686 | 1.0111 | 1.2191 | 0.8532 |
| F13_1  | F   | 1.3981 | 0.6335 | 0.5345 | 0.8420 | 0.7474 | 0.9751 | 1.204  | 0.8228 |
| F13_12 | F   | 1.4140 | 0.6605 | 0.5637 | 0.8416 | 0.7664 | 0.9856 | 1.2159 | 0.8390 |
| F13_13 | F   | 1.4255 | 0.6779 | 0.5893 | 0.8899 | 0.7889 | 1.0264 | 1.2202 | 0.8654 |
| F13_17 | F   | 1.4226 | 0.6696 | 0.5688 | 0.8681 | 0.7863 | 1.0056 | 1.2212 | 0.8533 |
| F13_18 | F   | 1.3945 | 0.6519 | 0.5673 | 0.8259 | 0.7259 | 0.9542 | 1.1984 | 0.8206 |
| F13_19 | F   | 1.4191 | 0.6634 | 0.4395 | 0.8756 | 0.7769 | 1.0055 | 1.2434 | 0.8340 |
| F13_23 | F   | 1.4097 | 0.6561 | 0.5568 | 0.8595 | 0.7723 | 1.0069 | 1.2085 | 0.8434 |
| F13_24 | F   | 1.4161 | 0.6696 | 0.5572 | 0.8667 | 0.7716 | 1.0072 | 1.2188 | 0.8485 |
| F13_3  | F   | 1.4406 | 0.6755 | 0.5529 | 0.8749 | 0.7933 | 1.0228 | 1.2503 | 0.8616 |
| F13_30 | F   | 1.4063 | 0.6425 | 0.5882 | 0.8535 | 0.7500 | 0.9806 | 1.2038 | 0.8364 |
| F13_32 | F   | 1.4007 | 0.6522 | 0.5982 | 0.8401 | 0.7495 | 0.9875 | 1.1925 | 0.8367 |
| F13_36 | F   | 1.4285 | 0.6773 | 0.6168 | 0.8899 | 0.7677 | 1.005  | 1.226  | 0.8638 |
| F13_38 | F   | 1.4377 | 0.6755 | 0.6280 | 0.8727 | 0.7945 | 1.0145 | 1.2284 | 0.8689 |
| F13_39 | F   | 1.4356 | 0.6742 | 0.5927 | 0.8772 | 0.7870 | 1.0268 | 1.2362 | 0.8657 |
| F13_4  | F   | 1.4160 | 0.6690 | 0.5249 | 0.8623 | 0.7738 | 1.0127 | 1.2246 | 0.8445 |
| F13_40 | F   | 1.4202 | 0.6643 | 0.5835 | 0.8643 | 0.7735 | 1.0099 | 1.2187 | 0.8524 |
| F13_46 | F   | 1.4491 | 0.6727 | 0.6363 | 0.8806 | 0.7970 | 1.0273 | 1.2438 | 0.8763 |

|        |   |        |        |        |        |        |          |          |        |
|--------|---|--------|--------|--------|--------|--------|----------|----------|--------|
| F13_48 | F | 1.4322 | 0.6696 | 0.5565 | 0.8694 | 0.7982 | 1.0195   | 1.2347   | 0.8580 |
| F13_5  | F | 1.4294 | 0.6773 | 0.5615 | 0.8760 | 0.7853 | 1.0228   | 1.2339   | 0.8595 |
| F13_53 | F | 1.4049 | 0.6415 | 0.5523 | 0.8494 | 0.7632 | 0.9824   | 1.2052   | 0.8323 |
| F13_6  | F | 1.4260 | 0.6599 | 0.5343 | 0.8806 | 0.7750 | 1.0172   | 1.2378   | 0.8508 |
| F13_67 | F | 1.4280 | 0.6650 | 0.6007 | 0.8607 | 0.7851 | 1.0069   | 1.2229   | 0.8569 |
| F13_7  | F | 1.4211 | 0.6634 | 0.5272 | 0.8623 | 0.7728 | 1.0093   | 1.2324   | 0.8446 |
| F13_81 | F | 1.3922 | 0.6542 | 0.5715 | 0.8607 | 0.7469 | 0.9799   | 1.1864   | 0.8333 |
| M07_10 | M | 1.3907 | 0.6215 | 0.5745 | 0.7980 | 0.7551 | 0.9893   | 1.1802   | 0.8198 |
| M07_27 | M | 1.4153 | 0.6411 | 0.6137 | 0.8317 | 0.7679 | 0.9647   | 1.2055   | 0.8374 |
| M07_50 | M | 1.3996 | 0.6345 | 0.5647 | 0.8274 | 0.7597 | 0.9844   | 1.1952   | 0.8277 |
| M07_66 | M | 1.3810 | 0.6160 | 0.6013 | 0.7926 | 0.7229 | 0.9574   | 1.1693   | 0.8099 |
| M07_73 | M | 1.3960 | 0.6243 | 0.5888 | 0.8169 | 0.7484 | 0.9824   | 1.1877   | 0.8247 |
| M08_43 | M | 1.4053 | 0.6362 | 0.5326 | 0.8527 | 0.7704 | 0.9866   | 1.2075   | 0.8310 |
| M08_47 | M | 1.4012 | 0.6392 | 0.6274 | 0.8363 | 0.7464 | 0.9685   | 1.1867   | 0.8341 |
| M08_52 | M | 1.4064 | 0.6294 | 0.5786 | 0.8488 | 0.7589 | 0.9814   | 1.2031   | 0.8334 |
| M08_57 | M | 1.4049 | 0.6184 | 0.6052 | 0.8293 | 0.7319 | 0.9897   | 1.2036   | 0.8297 |
| M08_58 | M | 1.4127 | 0.6631 | 0.5657 | 0.8653 | 0.7667 | 0.9953   | 1.2133   | 0.8449 |
| M08_61 | M | 1.4053 | 0.6358 | 0.5268 | 0.8407 | 0.7632 | 0.9934   | 1.2113   | 0.8285 |
| M08_70 | M | 1.3930 | 0.6431 | 0.5167 | 0.8533 | 0.7425 | 0.9782   | 1.2015   | 0.8226 |
| M08_72 | M | 1.4127 | 0.6428 | 0.6223 | 0.8467 | 0.7459 | 1.0106   | 1.2069   | 0.8459 |
| M08_75 | M | 1.3891 | 0.6457 | 0.5916 | 0.8378 | 0.7432 | 0.945    | 1.1777   | 0.8235 |
| M08_77 | M | 1.3942 | 0.6444 | 0.6141 | 0.8535 | 0.7112 | 0.972384 | 1.191185 | 0.8311 |
| M08_79 | M | 1.4141 | 0.6558 | 0.5744 | 0.8591 | 0.7696 | 1.0035   | 1.2125   | 0.8458 |
| M13_11 | M | 1.3827 | 0.6243 | 0.5604 | 0.8299 | 0.7398 | 0.9686   | 1.1764   | 0.8166 |
| M13_14 | M | 1.3807 | 0.6226 | 0.5492 | 0.8323 | 0.7419 | 0.951    | 1.1751   | 0.8120 |
| M13_15 | M | 1.4161 | 0.6640 | 0.5912 | 0.8829 | 0.7711 | 0.9795   | 1.2112   | 0.8500 |
| M13_16 | M | 1.4003 | 0.6382 | 0.4956 | 0.8312 | 0.7554 | 0.994    | 1.2125   | 0.8212 |
| M13_20 | M | 1.3825 | 0.6311 | 0.5169 | 0.8418 | 0.7500 | 0.9836   | 1.1823   | 0.8176 |
| M13_21 | M | 1.3714 | 0.6180 | 0.5313 | 0.8388 | 0.7356 | 0.9325   | 1.1667   | 0.8038 |
| M13_22 | M | 1.3987 | 0.6599 | 0.5497 | 0.8690 | 0.7684 | 0.9972   | 1.194    | 0.8397 |
| M13_26 | M | 1.3957 | 0.6415 | 0.5609 | 0.8545 | 0.7609 | 0.9889   | 1.1894   | 0.8327 |
| M13_28 | M | 1.3997 | 0.6328 | 0.5510 | 0.8293 | 0.7393 | 0.9617   | 1.2057   | 0.8200 |
| M13_29 | M | 1.3733 | 0.6368 | 0.4967 | 0.8204 | 0.7409 | 0.9602   | 1.1754   | 0.8051 |
| M13_31 | M | 1.3867 | 0.6215 | 0.5897 | 0.7945 | 0.7248 | 0.97     | 1.1809   | 0.8136 |
| M13_33 | M | 1.3810 | 0.6198 | 0.5418 | 0.8355 | 0.7297 | 0.9539   | 1.1817   | 0.8104 |
| M13_34 | M | 1.3509 | 0.5981 | 0.5185 | 0.7757 | 0.7064 | 0.9186   | 1.1476   | 0.7775 |
| M13_35 | M | 1.3731 | 0.6142 | 0.5140 | 0.8171 | 0.7340 | 0.9568   | 1.1739   | 0.8017 |
| M13_49 | M | 1.4098 | 0.6577 | 0.6053 | 0.8627 | 0.7561 | 0.9806   | 1.203    | 0.8442 |

|        |   |        |        |        |        |        |        |        |        |
|--------|---|--------|--------|--------|--------|--------|--------|--------|--------|
| M13_51 | M | 1.3833 | 0.6311 | 0.5488 | 0.8233 | 0.7385 | 0.9777 | 1.1806 | 0.8167 |
| M13_54 | M | 1.3818 | 0.6451 | 0.5548 | 0.8299 | 0.7409 | 0.9609 | 1.1759 | 0.8179 |
| M13_55 | M | 1.4201 | 0.6693 | 0.6139 | 0.8583 | 0.7813 | 0.9862 | 1.2083 | 0.8529 |
| M13_56 | M | 1.3886 | 0.6232 | 0.5043 | 0.8217 | 0.7526 | 0.9689 | 1.1936 | 0.8107 |
| M13_64 | M | 1.4094 | 0.6382 | 0.5626 | 0.8643 | 0.7713 | 0.9682 | 1.2071 | 0.8353 |
| M13_68 | M | 1.4066 | 0.6444 | 0.5819 | 0.8569 | 0.7642 | 0.9817 | 1.2007 | 0.8383 |
| M13_78 | M | 1.3599 | 0.5944 | 0.5431 | 0.7815 | 0.7196 | 0.9205 | 1.1513 | 0.7851 |
| M13_8  | M | 1.3826 | 0.6099 | 0.4676 | 0.8064 | 0.7364 | 0.9555 | 1.1972 | 0.7955 |
| M13_80 | M | 1.3622 | 0.6232 | 0.5331 | 0.8122 | 0.7270 | 0.9236 | 1.1547 | 0.7956 |

(b) Values of male dimensions adjusted for sexual differences.

| ID     | sex | BL     | HW     | HL     | TW     | TL     | EW     | EL     | GM     |
|--------|-----|--------|--------|--------|--------|--------|--------|--------|--------|
| F07_2  | F   | 1.4199 | 0.6431 | 0.5399 | 0.8302 | 0.7820 | 1.0033 | 1.2247 | 0.8372 |
| F07_37 | F   | 1.4244 | 0.6640 | 0.5860 | 0.8641 | 0.7870 | 1.0117 | 1.2199 | 0.8555 |
| F07_45 | F   | 1.4259 | 0.6497 | 0.5431 | 0.8488 | 0.7896 | 1.0063 | 1.2307 | 0.8447 |
| F07_60 | F   | 1.4340 | 0.6721 | 0.5748 | 0.8774 | 0.7877 | 1.0235 | 1.2374 | 0.8622 |
| F07_65 | F   | 1.3940 | 0.6385 | 0.5383 | 0.8156 | 0.7564 | 0.9812 | 1.1935 | 0.8206 |
| F07_69 | F   | 1.3820 | 0.6205 | 0.5676 | 0.7989 | 0.7313 | 0.9576 | 1.1766 | 0.8088 |
| F07_9  | F   | 1.4341 | 0.6709 | 0.6256 | 0.8573 | 0.7827 | 1.0202 | 1.2275 | 0.8640 |
| F08_41 | F   | 1.4219 | 0.6564 | 0.6044 | 0.8733 | 0.7834 | 1.0119 | 1.2128 | 0.8570 |
| F08_42 | F   | 1.4198 | 0.6650 | 0.5825 | 0.8679 | 0.7718 | 1.0144 | 1.2189 | 0.8534 |
| F08_44 | F   | 1.4320 | 0.6739 | 0.5806 | 0.8760 | 0.7820 | 1.0208 | 1.2350 | 0.8614 |
| F08_59 | F   | 1.4138 | 0.6596 | 0.5717 | 0.8708 | 0.7644 | 1.0148 | 1.2145 | 0.8493 |
| F08_62 | F   | 1.4145 | 0.6699 | 0.5785 | 0.8645 | 0.7704 | 0.9964 | 1.2119 | 0.8486 |
| F08_63 | F   | 1.4357 | 0.6755 | 0.6378 | 0.8821 | 0.7832 | 1.0198 | 1.2268 | 0.8709 |
| F08_71 | F   | 1.4157 | 0.6612 | 0.6199 | 0.8671 | 0.7569 | 1.0275 | 1.2085 | 0.8569 |
| F08_74 | F   | 1.4266 | 0.6739 | 0.6137 | 0.8971 | 0.7912 | 1.0100 | 1.2152 | 0.8669 |
| F08_76 | F   | 1.4175 | 0.6668 | 0.5706 | 0.8831 | 0.7686 | 1.0111 | 1.2191 | 0.8532 |
| F13_1  | F   | 1.3981 | 0.6335 | 0.5345 | 0.8420 | 0.7474 | 0.9751 | 1.2040 | 0.8228 |
| F13_12 | F   | 1.4140 | 0.6605 | 0.5637 | 0.8416 | 0.7664 | 0.9856 | 1.2159 | 0.8390 |
| F13_13 | F   | 1.4255 | 0.6779 | 0.5893 | 0.8899 | 0.7889 | 1.0264 | 1.2202 | 0.8654 |
| F13_17 | F   | 1.4226 | 0.6696 | 0.5688 | 0.8681 | 0.7863 | 1.0056 | 1.2212 | 0.8533 |
| F13_18 | F   | 1.3945 | 0.6519 | 0.5673 | 0.8259 | 0.7259 | 0.9542 | 1.1984 | 0.8206 |
| F13_19 | F   | 1.4191 | 0.6634 | 0.4395 | 0.8756 | 0.7769 | 1.0055 | 1.2434 | 0.8340 |
| F13_23 | F   | 1.4097 | 0.6561 | 0.5568 | 0.8595 | 0.7723 | 1.0069 | 1.2085 | 0.8434 |
| F13_24 | F   | 1.4161 | 0.6696 | 0.5572 | 0.8667 | 0.7716 | 1.0072 | 1.2188 | 0.8485 |
| F13_3  | F   | 1.4406 | 0.6755 | 0.5529 | 0.8749 | 0.7933 | 1.0228 | 1.2503 | 0.8616 |
| F13_30 | F   | 1.4063 | 0.6425 | 0.5882 | 0.8535 | 0.7500 | 0.9806 | 1.2038 | 0.8364 |

|        |   |        |        |        |        |        |        |        |        |
|--------|---|--------|--------|--------|--------|--------|--------|--------|--------|
| F13_32 | F | 1.4007 | 0.6522 | 0.5982 | 0.8401 | 0.7495 | 0.9875 | 1.1925 | 0.8367 |
| F13_36 | F | 1.4285 | 0.6773 | 0.6168 | 0.8899 | 0.7677 | 1.0050 | 1.2260 | 0.8638 |
| F13_38 | F | 1.4377 | 0.6755 | 0.6280 | 0.8727 | 0.7945 | 1.0145 | 1.2284 | 0.8689 |
| F13_39 | F | 1.4356 | 0.6742 | 0.5927 | 0.8772 | 0.7870 | 1.0268 | 1.2362 | 0.8657 |
| F13_4  | F | 1.4160 | 0.6690 | 0.5249 | 0.8623 | 0.7738 | 1.0127 | 1.2246 | 0.8445 |
| F13_40 | F | 1.4202 | 0.6643 | 0.5835 | 0.8643 | 0.7735 | 1.0099 | 1.2187 | 0.8524 |
| F13_46 | F | 1.4491 | 0.6727 | 0.6363 | 0.8806 | 0.7970 | 1.0273 | 1.2438 | 0.8763 |
| F13_48 | F | 1.4322 | 0.6696 | 0.5565 | 0.8694 | 0.7982 | 1.0195 | 1.2347 | 0.8580 |
| F13_5  | F | 1.4294 | 0.6773 | 0.5615 | 0.8760 | 0.7853 | 1.0228 | 1.2339 | 0.8595 |
| F13_53 | F | 1.4049 | 0.6415 | 0.5523 | 0.8494 | 0.7632 | 0.9824 | 1.2052 | 0.8323 |
| F13_6  | F | 1.4260 | 0.6599 | 0.5343 | 0.8806 | 0.7750 | 1.0172 | 1.2378 | 0.8508 |
| F13_67 | F | 1.4280 | 0.6650 | 0.6007 | 0.8607 | 0.7851 | 1.0069 | 1.2229 | 0.8569 |
| F13_7  | F | 1.4211 | 0.6634 | 0.5272 | 0.8623 | 0.7728 | 1.0093 | 1.2324 | 0.8446 |
| F13_81 | F | 1.3922 | 0.6542 | 0.5715 | 0.8607 | 0.7469 | 0.9799 | 1.1864 | 0.8333 |
| M07_10 | M | 1.4172 | 0.6497 | 0.5888 | 0.8269 | 0.7813 | 1.0238 | 1.2098 | 0.8467 |
| M07_27 | M | 1.4418 | 0.6693 | 0.6283 | 0.8606 | 0.7941 | 0.9992 | 1.2351 | 0.8644 |
| M07_50 | M | 1.4261 | 0.6626 | 0.5784 | 0.8563 | 0.7858 | 1.0189 | 1.2248 | 0.8545 |
| M07_66 | M | 1.4075 | 0.6441 | 0.6166 | 0.8216 | 0.7491 | 0.9920 | 1.1989 | 0.8370 |
| M07_73 | M | 1.4225 | 0.6525 | 0.6032 | 0.8459 | 0.7746 | 1.0169 | 1.2173 | 0.8517 |
| M08_43 | M | 1.4318 | 0.6643 | 0.5448 | 0.8816 | 0.7965 | 1.0211 | 1.2371 | 0.8576 |
| M08_47 | M | 1.4277 | 0.6673 | 0.6429 | 0.8653 | 0.7726 | 1.0030 | 1.2163 | 0.8612 |
| M08_52 | M | 1.4329 | 0.6576 | 0.5922 | 0.8778 | 0.7851 | 1.0159 | 1.2327 | 0.8602 |
| M08_57 | M | 1.4314 | 0.6466 | 0.6197 | 0.8583 | 0.7580 | 1.0243 | 1.2332 | 0.8567 |
| M08_58 | M | 1.4392 | 0.6912 | 0.5788 | 0.8943 | 0.7928 | 1.0299 | 1.2429 | 0.8716 |
| M08_61 | M | 1.4319 | 0.6640 | 0.5393 | 0.8697 | 0.7894 | 1.0279 | 1.2409 | 0.8552 |
| M08_70 | M | 1.4195 | 0.6713 | 0.5286 | 0.8822 | 0.7686 | 1.0127 | 1.2311 | 0.8491 |
| M08_72 | M | 1.4392 | 0.6710 | 0.6372 | 0.8757 | 0.7720 | 1.0451 | 1.2365 | 0.8729 |
| M08_75 | M | 1.4156 | 0.6739 | 0.6063 | 0.8667 | 0.7694 | 0.9795 | 1.2073 | 0.8505 |
| M08_77 | M | 1.4207 | 0.6726 | 0.6291 | 0.8824 | 0.7374 | 1.0069 | 1.2208 | 0.8582 |
| M08_79 | M | 1.4406 | 0.6839 | 0.5876 | 0.8881 | 0.7958 | 1.0380 | 1.2421 | 0.8726 |
| M13_11 | M | 1.4092 | 0.6525 | 0.5744 | 0.8589 | 0.7660 | 1.0031 | 1.2060 | 0.8435 |
| M13_14 | M | 1.4072 | 0.6507 | 0.5628 | 0.8612 | 0.7681 | 0.9855 | 1.2047 | 0.8388 |
| M13_15 | M | 1.4427 | 0.6922 | 0.6057 | 0.9119 | 0.7973 | 1.0141 | 1.2408 | 0.8770 |
| M13_16 | M | 1.4268 | 0.6663 | 0.5064 | 0.8602 | 0.7815 | 1.0285 | 1.2421 | 0.8475 |
| M13_20 | M | 1.4090 | 0.6593 | 0.5292 | 0.8707 | 0.7762 | 1.0181 | 1.2119 | 0.8442 |
| M13_21 | M | 1.3980 | 0.6462 | 0.5454 | 0.8678 | 0.7618 | 0.9670 | 1.1963 | 0.8307 |
| M13_22 | M | 1.4252 | 0.6881 | 0.5628 | 0.8980 | 0.7946 | 1.0318 | 1.2236 | 0.8665 |
| M13_26 | M | 1.4223 | 0.6696 | 0.5752 | 0.8835 | 0.7871 | 1.0234 | 1.2190 | 0.8596 |

---

|        |   |        |        |        |        |        |        |        |        |
|--------|---|--------|--------|--------|--------|--------|--------|--------|--------|
| M13_28 | M | 1.4263 | 0.6610 | 0.5645 | 0.8583 | 0.7655 | 0.9962 | 1.2353 | 0.8468 |
| M13_29 | M | 1.3999 | 0.6650 | 0.5094 | 0.8494 | 0.7671 | 0.9947 | 1.2050 | 0.8318 |
| M13_31 | M | 1.4133 | 0.6497 | 0.6050 | 0.8234 | 0.7510 | 1.0045 | 1.2105 | 0.8407 |
| M13_33 | M | 1.4075 | 0.6480 | 0.5550 | 0.8644 | 0.7559 | 0.9884 | 1.2113 | 0.8372 |
| M13_34 | M | 1.3774 | 0.6262 | 0.5320 | 0.8047 | 0.7326 | 0.9531 | 1.1772 | 0.8043 |
| M13_35 | M | 1.3996 | 0.6424 | 0.5265 | 0.8461 | 0.7602 | 0.9913 | 1.2035 | 0.8283 |
| M13_49 | M | 1.4363 | 0.6859 | 0.6198 | 0.8917 | 0.7823 | 1.0151 | 1.2326 | 0.8712 |
| M13_51 | M | 1.4098 | 0.6593 | 0.5622 | 0.8522 | 0.7647 | 1.0122 | 1.2102 | 0.8435 |
| M13_54 | M | 1.4084 | 0.6733 | 0.5693 | 0.8589 | 0.7671 | 0.9955 | 1.2055 | 0.8449 |
| M13_55 | M | 1.4466 | 0.6975 | 0.6284 | 0.8873 | 0.8075 | 1.0207 | 1.2379 | 0.8799 |
| M13_56 | M | 1.4151 | 0.6514 | 0.5161 | 0.8507 | 0.7787 | 1.0035 | 1.2232 | 0.8373 |
| M13_64 | M | 1.4359 | 0.6663 | 0.5756 | 0.8933 | 0.7975 | 1.0027 | 1.2367 | 0.8620 |
| M13_68 | M | 1.4331 | 0.6726 | 0.5958 | 0.8859 | 0.7904 | 1.0162 | 1.2303 | 0.8652 |
| M13_78 | M | 1.3864 | 0.6226 | 0.5573 | 0.8105 | 0.7458 | 0.9550 | 1.1809 | 0.8120 |
| M13_8  | M | 1.4091 | 0.6381 | 0.4777 | 0.8354 | 0.7626 | 0.9900 | 1.2268 | 0.8218 |
| M13_80 | M | 1.3887 | 0.6514 | 0.5469 | 0.8412 | 0.7532 | 0.9581 | 1.1843 | 0.8225 |

---

Table S2. RAD sequence data of parents and F2 individuals. Raw reads have been deposited at DNA Data Bank of Japan (DDBJ accession: DRA005547).

| Individual ID | Sex    | Generation | DRA accession |           |
|---------------|--------|------------|---------------|-----------|
|               |        |            | Experiment    | Run       |
| F07_2         | female | F2         | DRX081131     | DRR087302 |
| F07_37        | female | F2         | DRX081132     | DRR087303 |
| F07_45        | female | F2         | DRX081133     | DRR087304 |
| F07_60        | female | F2         | DRX081134     | DRR087305 |
| F07_65        | female | F2         | DRX081135     | DRR087306 |
| F07_69        | female | F2         | DRX081136     | DRR087307 |
| F07_9         | female | F2         | DRX081137     | DRR087308 |
| F08_41        | female | F2         | DRX081138     | DRR087309 |
| F08_42        | female | F2         | DRX081139     | DRR087310 |
| F08_44        | female | F2         | DRX081140     | DRR087311 |
| F08_59        | female | F2         | DRX081141     | DRR087312 |
| F08_62        | female | F2         | DRX081142     | DRR087313 |
| F08_63        | female | F2         | DRX081143     | DRR087314 |
| F08_71        | female | F2         | DRX081144     | DRR087315 |
| F08_74        | female | F2         | DRX081145     | DRR087316 |
| F08_76        | female | F2         | DRX081146     | DRR087317 |
| F13_1         | female | F2         | DRX081147     | DRR087318 |
| F13_12        | female | F2         | DRX081148     | DRR087319 |
| F13_13        | female | F2         | DRX081149     | DRR087320 |
| F13_17        | female | F2         | DRX081150     | DRR087321 |
| F13_18        | female | F2         | DRX081151     | DRR087322 |
| F13_19        | female | F2         | DRX081152     | DRR087323 |
| F13_23        | female | F2         | DRX081153     | DRR087324 |
| F13_24        | female | F2         | DRX081154     | DRR087325 |
| F13_3         | female | F2         | DRX081155     | DRR087326 |
| F13_30        | female | F2         | DRX081156     | DRR087327 |
| F13_32        | female | F2         | DRX081157     | DRR087328 |
| F13_36        | female | F2         | DRX081158     | DRR087329 |
| F13_38        | female | F2         | DRX081159     | DRR087330 |
| F13_39        | female | F2         | DRX081160     | DRR087331 |
| F13_4         | female | F2         | DRX081161     | DRR087332 |
| F13_40        | female | F2         | DRX081162     | DRR087333 |
| F13_46        | female | F2         | DRX081163     | DRR087334 |
| F13_48        | female | F2         | DRX081164     | DRR087335 |
| F13_5         | female | F2         | DRX081165     | DRR087336 |
| F13_53        | female | F2         | DRX081166     | DRR087337 |
| F13_6         | female | F2         | DRX081167     | DRR087338 |

|        |        |    |           |           |
|--------|--------|----|-----------|-----------|
| F13_67 | female | F2 | DRX081168 | DRR087339 |
| F13_7  | female | F2 | DRX081169 | DRR087340 |
| F13_81 | female | F2 | DRX081170 | DRR087341 |
| M07_10 | male   | F2 | DRX081171 | DRR087342 |
| M07_27 | male   | F2 | DRX081172 | DRR087343 |
| M07_50 | male   | F2 | DRX081173 | DRR087344 |
| M07_66 | male   | F2 | DRX081174 | DRR087345 |
| M07_73 | male   | F2 | DRX081175 | DRR087346 |
| M08_43 | male   | F2 | DRX081176 | DRR087347 |
| M08_47 | male   | F2 | DRX081177 | DRR087348 |
| M08_52 | male   | F2 | DRX081178 | DRR087349 |
| M08_57 | male   | F2 | DRX081179 | DRR087350 |
| M08_58 | male   | F2 | DRX081180 | DRR087351 |
| M08_61 | male   | F2 | DRX081181 | DRR087352 |
| M08_70 | male   | F2 | DRX081182 | DRR087353 |
| M08_72 | male   | F2 | DRX081183 | DRR087354 |
| M08_75 | male   | F2 | DRX081184 | DRR087355 |
| M08_77 | male   | F2 | DRX081185 | DRR087356 |
| M08_79 | male   | F2 | DRX081186 | DRR087357 |
| M13_11 | male   | F2 | DRX081187 | DRR087358 |
| M13_14 | male   | F2 | DRX081188 | DRR087359 |
| M13_15 | male   | F2 | DRX081189 | DRR087360 |
| M13_16 | male   | F2 | DRX081190 | DRR087361 |
| M13_20 | male   | F2 | DRX081191 | DRR087362 |
| M13_21 | male   | F2 | DRX081192 | DRR087363 |
| M13_22 | male   | F2 | DRX081193 | DRR087364 |
| M13_26 | male   | F2 | DRX081194 | DRR087365 |
| M13_28 | male   | F2 | DRX081195 | DRR087366 |
| M13_29 | male   | F2 | DRX081196 | DRR087367 |
| M13_31 | male   | F2 | DRX081197 | DRR087368 |
| M13_33 | male   | F2 | DRX081198 | DRR087369 |
| M13_34 | male   | F2 | DRX081199 | DRR087370 |
| M13_35 | male   | F2 | DRX081200 | DRR087371 |
| M13_49 | male   | F2 | DRX081201 | DRR087372 |
| M13_51 | male   | F2 | DRX081202 | DRR087373 |
| M13_54 | male   | F2 | DRX081203 | DRR087374 |
| M13_55 | male   | F2 | DRX081204 | DRR087375 |
| M13_56 | male   | F2 | DRX081205 | DRR087376 |
| M13_64 | male   | F2 | DRX081206 | DRR087377 |
| M13_68 | male   | F2 | DRX081207 | DRR087378 |
| M13_78 | male   | F2 | DRX081208 | DRR087379 |

|        |        |    |           |           |
|--------|--------|----|-----------|-----------|
| M13_8  | male   | F2 | DRX081209 | DRR087380 |
| M13_80 | male   | F2 | DRX081210 | DRR087381 |
| GF07   | male   | P  | DRX081211 | DRR087382 |
| GF08   | male   | P  | DRX081212 | DRR087383 |
| GF12   | male   | P  | DRX081213 | DRR087384 |
| GF13   | male   | P  | DRX081214 | DRR087385 |
| GM07   | female | P  | DRX081215 | DRR087386 |
| GM08   | female | P  | DRX081216 | DRR087387 |
| GM12   | female | P  | DRX081217 | DRR087388 |
| GM13   | female | P  | DRX081218 | DRR087389 |

---

Table S3. Candidate genes and their GO terms in the scaffolds with QTL. *Drosophila melanogaster* was used for RefSeq protein ID.

| Linkage group | scaffold     | Locus ID                                   | start   | stop    | QTL region (or closest QTL) | RefSeq protein ID | Gene.Name                                                | Category of gene functions for candidate gene search |                                                                                                                                                                    |                                                           |                                                                                                   |                                                               |                                                                                       |                                                                                                                                                                                                                                    |                                               |                                               |                       |  |
|---------------|--------------|--------------------------------------------|---------|---------|-----------------------------|-------------------|----------------------------------------------------------|------------------------------------------------------|--------------------------------------------------------------------------------------------------------------------------------------------------------------------|-----------------------------------------------------------|---------------------------------------------------------------------------------------------------|---------------------------------------------------------------|---------------------------------------------------------------------------------------|------------------------------------------------------------------------------------------------------------------------------------------------------------------------------------------------------------------------------------|-----------------------------------------------|-----------------------------------------------|-----------------------|--|
|               |              |                                            |         |         |                             |                   |                                                          | cell proliferation                                   | cell size/cell growth                                                                                                                                              | wing size                                                 | regulation of growth                                                                              | insulin-like growth factor/insulin receptor signaling pathway | Wnt signaling pathway                                                                 | EGFR signaling pathway                                                                                                                                                                                                             | EGF-like domain                               | Hippo signaling pathway                       | TOR signaling pathway |  |
| 2             | scaffold 350 | evm.model.scaffol<br>d350_cov98.73<br>EVM  | 964778  | 1097768 |                             | NP_001096924      | Megalyn(mgl)                                             |                                                      |                                                                                                                                                                    |                                                           |                                                                                                   |                                                               | IPR009030:Insulin-like growth factor binding protein                                  |                                                                                                                                                                                                                                    |                                               | IPR000742:Epidermal growth factor-like domain |                       |  |
| 2             | scaffold 350 | evm.model.scaffol<br>d350_cov98.108<br>EVM | 1524920 | 1531752 |                             | NP_524045         | araucan(ara)                                             |                                                      |                                                                                                                                                                    |                                                           | GO:0045926--negative regulation of growth                                                         |                                                               |                                                                                       |                                                                                                                                                                                                                                    |                                               |                                               |                       |  |
| 2             | scaffold 350 | evm.model.scaffol<br>d350_cov98.111<br>EVM | 1558555 | 1586270 |                             | NP_524047         | mirror(mirr)                                             |                                                      |                                                                                                                                                                    |                                                           | GO:0045926--negative regulation of growth                                                         |                                                               |                                                                                       |                                                                                                                                                                                                                                    |                                               |                                               |                       |  |
| 2             | scaffold 350 | evm.model.scaffol<br>d350_cov98.149<br>EVM | 2143088 | 2143711 |                             | NP_525062         | CG10798 gene product from transcript CG10798-RB(Myc)     | GO:0008283--cell proliferation                       | GO:0001558--regulation of cell growth;GO:0008361--regulation of cell size;0030307--positive regulation of cell growth;GO:0045793--positive regulation of cell size | GO:0044719--regulation of imaginal disc-derived wing size | GO:0045927--positive regulation of growth;GO:0048639--positive regulation of developmental growth |                                                               | dme04310:Wnt signaling pathway                                                        |                                                                                                                                                                                                                                    |                                               | dme04391:Hippo signaling pathway              |                       |  |
| 2             | scaffold 350 | evm.model.scaffol<br>d350_cov98.186<br>EVM | 2662042 | 2665126 |                             | NP_611856         | CG2980 gene product from transcript CG2980-RA(thoc5)     | GO:0008283--cell proliferation                       |                                                                                                                                                                    |                                                           |                                                                                                   |                                                               |                                                                                       |                                                                                                                                                                                                                                    |                                               |                                               |                       |  |
| 2             | scaffold 350 | evm.model.scaffol<br>d350_cov98.193<br>EVM | 2796174 | 2797924 |                             | NP_001260391      | crooked legs(crol)                                       |                                                      |                                                                                                                                                                    |                                                           |                                                                                                   |                                                               | GO:0030178--negative regulation of Wnt signaling pathway                              |                                                                                                                                                                                                                                    |                                               |                                               |                       |  |
| 2             | scaffold 350 | evm.model.scaffol<br>d350_cov98.243<br>EVM | 3348451 | 3349209 |                             | NP_610454         | tsunagi(tsu)                                             |                                                      |                                                                                                                                                                    |                                                           |                                                                                                   |                                                               | GO:0007173--epidermal growth factor receptor signaling pathway                        |                                                                                                                                                                                                                                    |                                               |                                               |                       |  |
| 2             | scaffold 350 | evm.model.scaffol<br>d350_cov98.254<br>EVM | 3531820 | 3533379 |                             | NP_724096         | Suppressor of cytokine signaling at 36E(Socs36E)         |                                                      |                                                                                                                                                                    |                                                           |                                                                                                   |                                                               | GO:0042059--negative regulation of epidermal growth factor receptor signaling pathway |                                                                                                                                                                                                                                    |                                               |                                               |                       |  |
| 2             | scaffold 350 | evm.model.scaffol<br>d350_cov98.272<br>EVM | 3657247 | 3662582 |                             | NP_477243         | crooked legs(crol)                                       |                                                      |                                                                                                                                                                    |                                                           |                                                                                                   |                                                               | GO:0030178--negative regulation of Wnt signaling pathway                              |                                                                                                                                                                                                                                    |                                               |                                               |                       |  |
| 2             | scaffold 350 | evm.model.scaffol<br>d350_cov98.275<br>EVM | 3667013 | 3668326 |                             | NP_573019         | CG12608 gene product from transcript CG12608-RA(CG12608) | GO:0008283--cell proliferation                       |                                                                                                                                                                    |                                                           |                                                                                                   |                                                               |                                                                                       |                                                                                                                                                                                                                                    |                                               |                                               |                       |  |
| 2             | scaffold 350 | evm.model.scaffol<br>d350_cov98.276<br>EVM | 3668851 | 3672455 |                             | NP_001137978      | CG8786 gene product from transcript CG8786-RG(CG8786)    |                                                      |                                                                                                                                                                    |                                                           |                                                                                                   |                                                               | GO:0016055--Wnt signaling pathway                                                     |                                                                                                                                                                                                                                    |                                               |                                               |                       |  |
| 2             | scaffold 350 | evm.model.scaffol<br>d350_cov98.300<br>EVM | 3972850 | 3973336 |                             | NP_524129         | Keren(Krn)                                               | 0008284--positive regulation of cell proliferation   |                                                                                                                                                                    |                                                           |                                                                                                   |                                                               |                                                                                       | GO:0007173--epidermal growth factor receptor signaling pathway;GO:0042058--regulation of epidermal growth factor receptor signaling pathway;GO:0045741--positive regulation of epidermal growth factor-activated receptor activity | IPR000742:Epidermal growth factor-like domain | dme04391:Hippo signaling pathway              |                       |  |

|   |              |                                     |         |         |        |              |                                                                          |                                                       |                                              |                                                           |                                                                                                        |                                                                  |                                                                                                                                                     |  |                                               |                                  |
|---|--------------|-------------------------------------|---------|---------|--------|--------------|--------------------------------------------------------------------------|-------------------------------------------------------|----------------------------------------------|-----------------------------------------------------------|--------------------------------------------------------------------------------------------------------|------------------------------------------------------------------|-----------------------------------------------------------------------------------------------------------------------------------------------------|--|-----------------------------------------------|----------------------------------|
| 2 | scaffold 350 | evm.model.scaffold350_cov98.325 EVM | 4228695 | 4231856 | HW     | NP_001260030 | dumpy(dpy)                                                               |                                                       |                                              | GO:0044719--regulation of imaginal disc-derived wing size |                                                                                                        | IPR009030:Insulin-like growth factor binding protein             |                                                                                                                                                     |  | IPR000742:Epidermal growth factor-like domain |                                  |
| 5 | scaffold 119 | evm.model.scaffold119_cov99.28 EVM  | 362293  | 427870  | TW, GM | NP_001188674 | CG11940 gene product from transcript CG11940-RB(pico)                    |                                                       | GO:0008361--regulation of cell size          |                                                           | GO:0048639--positive regulation of developmental growth                                                |                                                                  |                                                                                                                                                     |  |                                               |                                  |
| 5 | scaffold 119 | evm.model.scaffold119_cov99.35 EVM  | 533183  | 537067  | TW     | NP_649531    | humpty dumpty(hd)                                                        | GO:0008283--cell proliferation                        |                                              |                                                           |                                                                                                        |                                                                  |                                                                                                                                                     |  |                                               |                                  |
| 5 | scaffold 119 | evm.model.scaffold119_cov99.41 EVM  | 560402  | 561813  | TW     | NP_649051    | Charged multivesicular body protein 1(Chmp1)                             |                                                       |                                              |                                                           |                                                                                                        |                                                                  | GO:0042059--negative regulation of epidermal growth factor receptor signaling pathway                                                               |  |                                               |                                  |
| 5 | scaffold 119 | evm.model.scaffold119_cov99.53 EVM  | 741244  | 743446  | TW     | NP_611691    | CG4207 gene product from transcript CG4207-RA(bonsai)                    |                                                       |                                              |                                                           | GO:0040008--regulation of growth                                                                       |                                                                  |                                                                                                                                                     |  |                                               |                                  |
| 5 | scaffold 119 | evm.model.scaffold119_cov99.83 EVM  | 1186599 | 1191388 | TW     | NP_523946    | sulfateless(sfl)                                                         |                                                       |                                              |                                                           |                                                                                                        | GO:0060828--regulation of canonical Wnt signaling pathway        |                                                                                                                                                     |  |                                               |                                  |
| 5 | scaffold 119 | evm.model.scaffold119_cov99.229 EVM | 2471757 | 2478756 | TW     | NP_996243    | Signal-transducer and activator of transcription protein at 92E(Stat92E) | GO:0008284--positive regulation of cell proliferation |                                              |                                                           |                                                                                                        | GO:0030178--negative regulation of Wnt signaling pathway         |                                                                                                                                                     |  |                                               |                                  |
| 5 | scaffold 119 | evm.model.scaffold119_cov99.236 EVM | 2543793 | 2550978 |        | NP_724070    | Cadherin-N(CadN)                                                         |                                                       |                                              |                                                           |                                                                                                        | IPR009030:Insulin-like growth factor binding protein, N-terminal |                                                                                                                                                     |  | IPR000742:Epidermal growth factor-like domain |                                  |
| 5 | scaffold 119 | evm.model.scaffold119_cov99.237 EVM | 2551641 | 2556023 |        | NP_724069    | Cadherin-N(CadN)                                                         |                                                       |                                              |                                                           |                                                                                                        | IPR009030:Insulin-like growth factor binding protein, N-terminal |                                                                                                                                                     |  | IPR000742:Epidermal growth factor-like domain |                                  |
| 5 | scaffold 119 | evm.model.scaffold119_cov99.248 EVM | 2711234 | 2717267 |        | NP_724069    | Cadherin-N(CadN)                                                         |                                                       |                                              |                                                           |                                                                                                        | IPR009030:Insulin-like growth factor binding protein, N-terminal |                                                                                                                                                     |  | IPR000742:Epidermal growth factor-like domain |                                  |
| 5 | scaffold 119 | evm.model.scaffold119_cov99.250 EVM | 2791531 | 2809730 |        | NP_724071    | Cadherin-N(CadN)                                                         |                                                       |                                              |                                                           |                                                                                                        | IPR009030:Insulin-like growth factor binding protein, N-terminal |                                                                                                                                                     |  | IPR000742:Epidermal growth factor-like domain |                                  |
| 5 | scaffold 119 | evm.model.scaffold119_cov99.274 EVM | 2943269 | 2947825 |        | NP_651349    | Cadherin 96Ca(Cad96Ca)                                                   |                                                       | GO:0045792--negative regulation of cell size |                                                           |                                                                                                        |                                                                  |                                                                                                                                                     |  |                                               |                                  |
| 5 | scaffold 119 | evm.model.scaffold119_cov99.283 EVM | 2996937 | 3011314 |        | NP_523723    | vestigial(vg)                                                            | GO:0042127--regulation of cell proliferation          |                                              | GO:0044719--regulation of imaginal disc-derived wing size |                                                                                                        |                                                                  |                                                                                                                                                     |  |                                               |                                  |
| 5 | scaffold 119 | evm.model.scaffold119_cov99.292 EVM | 3068329 | 3070185 |        | NP_523983    | division abnormally delayed(dally)                                       |                                                       |                                              |                                                           | GO:0040014--regulation of multicellular organism growth,GO:0045570--regulation of imaginal disc growth |                                                                  | GO:0016055--Wnt signaling pathway                                                                                                                   |  |                                               | dme04391:Hippo signaling pathway |
| 5 | scaffold 119 | evm.model.scaffold119_cov99.293 EVM | 3079438 | 3080991 |        | NP_523983    | division abnormally delayed(dally)                                       |                                                       |                                              |                                                           | GO:0040014--regulation of multicellular organism growth,GO:0045570--regulation of imaginal disc growth |                                                                  | GO:0016055--Wnt signaling pathway                                                                                                                   |  |                                               | dme04391:Hippo signaling pathway |
| 5 | scaffold 119 | evm.model.scaffold119_cov99.300 EVM | 3118683 | 3120895 |        | NP_996075    | dally-like(dlp)                                                          |                                                       |                                              |                                                           | GO:0045570--regulation of imaginal disc growth                                                         |                                                                  | GO:0016055--Wnt signaling pathway,GO:0030177--positive regulation of Wnt signaling pathway,GO:0030178--negative regulation of Wnt signaling pathway |  |                                               |                                  |

|   |              |                                     |         |         |        |              |                                                                      |                                                                                                  |  |                                                                 |                                          |                                                                                                                    |                                                                             |                                                                                      |  |                                               |                                               |
|---|--------------|-------------------------------------|---------|---------|--------|--------------|----------------------------------------------------------------------|--------------------------------------------------------------------------------------------------|--|-----------------------------------------------------------------|------------------------------------------|--------------------------------------------------------------------------------------------------------------------|-----------------------------------------------------------------------------|--------------------------------------------------------------------------------------|--|-----------------------------------------------|-----------------------------------------------|
| 5 | scaffold 119 | evm.model.scaffold119_cov99.304 EVM | 3135234 | 3136961 |        | NP_476976    | dreadlocks(dock)                                                     |                                                                                                  |  |                                                                 |                                          | GO:0008286-insulin receptor signaling pathway;GO:0046627-negative regulation of insulin receptor signaling pathway |                                                                             |                                                                                      |  |                                               |                                               |
| 5 | scaffold 119 | evm.model.scaffold119_cov99.389 EVM | 3931062 | 3933029 |        | NP_573382    | kekkon5(kek5)                                                        |                                                                                                  |  |                                                                 |                                          |                                                                                                                    |                                                                             | GO:0042059-negative regulation of epidermal growth factor receptor signaling pathway |  |                                               |                                               |
| 5 | scaffold 119 | evm.model.scaffold119_cov99.445 EVM | 4734777 | 4746771 |        | NP_001188748 | taiman(tai)                                                          |                                                                                                  |  |                                                                 | GO:0045927-positive regulation of growth |                                                                                                                    |                                                                             |                                                                                      |  |                                               |                                               |
| 5 | scaffold 119 | evm.model.scaffold119_cov99.462 EVM | 5058213 | 5059355 |        | NP_524124    | target of Poxn(tap)                                                  |                                                                                                  |  |                                                                 |                                          |                                                                                                                    | GO:2000095-regulation of Wnt signaling pathway                              |                                                                                      |  |                                               |                                               |
| 5 | scaffold 119 | evm.model.scaffold119_cov99.489 EVM | 5310123 | 5311332 |        | NP_001260034 | dumpy(dpy)                                                           |                                                                                                  |  | GO:0044719-regulation of imaginal disc-derived wing size,       |                                          | IPR009030:Insulin-like growth factor binding protein                                                               |                                                                             |                                                                                      |  | IPR000742:Epidermal growth factor-like domain |                                               |
| 5 | scaffold 119 | evm.model.scaffold119_cov99.567 EVM | 6258243 | 6285759 |        | NP_524812    | frizzled(fz)                                                         |                                                                                                  |  |                                                                 |                                          |                                                                                                                    | GO:0016055-Wnt signaling pathway                                            |                                                                                      |  |                                               |                                               |
| 5 | scaffold 119 | evm.model.scaffold119_cov99.584 EVM | 6378979 | 6394147 |        | NP_477243    | crooked legs(crol)                                                   |                                                                                                  |  |                                                                 |                                          |                                                                                                                    | GO:0030178-negative regulation of Wnt signaling pathway                     |                                                                                      |  |                                               |                                               |
| 5 | scaffold 119 | evm.model.scaffold119_cov99.586 EVM | 6397832 | 6398943 |        | NP_650048    | Translationally controlled tumor protein ortholog (H. sapiens)(Tctp) |                                                                                                  |  | GO:0045793-positive regulation of cell size                     |                                          |                                                                                                                    |                                                                             |                                                                                      |  |                                               |                                               |
| 5 | scaffold 50  | evm.model.scaffold50_cov100.13 EVM  | 242793  | 243686  | BL, TW | NP_476972    | Wnt oncogene analog 4(Wnt4)                                          |                                                                                                  |  |                                                                 |                                          |                                                                                                                    | GO:0016055-Wnt signaling pathway                                            |                                                                                      |  |                                               |                                               |
| 5 | scaffold 50  | evm.model.scaffold50_cov100.14 EVM  | 261312  | 285637  | BL, TW | NP_523502    | wingless(wg)                                                         | GO:0008284-positive regulation of cell proliferation;GO:0042127-regulation of cell proliferation |  | GO:0044719-regulation of imaginal disc-derived wing size        |                                          |                                                                                                                    | GO:0016055-Wnt signaling pathway;GO:0060070-canonical Wnt signaling pathway |                                                                                      |  |                                               | dme04391:Hippo signaling pathway              |
| 5 | scaffold 50  | evm.model.scaffold50_cov100.15 EVM  | 298513  | 304172  | BL, TW | NP_609108    | Wnt oncogene analog 6(Wnt6)                                          |                                                                                                  |  | GO:0044719-regulation of imaginal disc-derived wing size        |                                          |                                                                                                                    | GO:0016055-Wnt signaling pathway                                            |                                                                                      |  |                                               |                                               |
| 5 | scaffold 50  | evm.model.scaffold50_cov100.18 EVM  | 326261  | 343685  | BL, TW | NP_609109    | Wnt oncogene analog 10(Wnt10)                                        |                                                                                                  |  |                                                                 |                                          |                                                                                                                    | GO:0016055-Wnt signaling pathway                                            |                                                                                      |  |                                               |                                               |
| 5 | scaffold 50  | evm.model.scaffold50_cov100.32 EVM  | 459230  | 462142  | BL, TW | NP_723814    | CG9293 gene product from transcript CG9293-RB(CG9293)                | GO:0008285-negative regulation of cell proliferation                                             |  |                                                                 |                                          |                                                                                                                    |                                                                             |                                                                                      |  |                                               |                                               |
| 5 | scaffold 50  | evm.model.scaffold50_cov100.36 EVM  | 487463  | 489203  | BL, TW | NP_523625    | Actin 42A(Act42A)                                                    |                                                                                                  |  |                                                                 |                                          |                                                                                                                    |                                                                             |                                                                                      |  |                                               | dme04391:Hippo signaling pathway              |
| 5 | scaffold 50  | evm.model.scaffold50_cov100.40 EVM  | 507945  | 513731  | BL, TW | NP_001260390 | crooked legs(crol)                                                   |                                                                                                  |  |                                                                 |                                          |                                                                                                                    | GO:0030178-negative regulation of Wnt signaling pathway                     |                                                                                      |  |                                               |                                               |
| 5 | scaffold 50  | evm.model.scaffold50_cov100.65 EVM  | 852836  | 855018  |        | NP_569915    | Nucleostemin ortholog (H. sapiens) 3(Ns3)                            |                                                                                                  |  | GO:0040018-positive regulation of multicellular organism growth |                                          | GO:0046626-regulation of insulin receptor signaling pathway;GO:0051168-nuclear export                              |                                                                             |                                                                                      |  |                                               |                                               |
| 5 | scaffold 50  | evm.model.scaffold50_cov100.72 EVM  | 868077  | 871247  |        | NP_648927    | sina homologue(sinah)                                                |                                                                                                  |  |                                                                 |                                          |                                                                                                                    | dme04310:Wnt signaling pathway                                              |                                                                                      |  |                                               |                                               |
| 5 | scaffold 50  | evm.model.scaffold50_cov100.77 EVM  | 896745  | 905689  |        | NP_001188806 | wing blister(wb)                                                     |                                                                                                  |  |                                                                 |                                          |                                                                                                                    |                                                                             |                                                                                      |  |                                               | IPR000742:Epidermal growth factor-like domain |
| 5 | scaffold 50  | evm.model.scaffold50_cov100.79 EVM  | 928822  | 946370  |        | NP_476790    | wing blister(wb)                                                     |                                                                                                  |  |                                                                 |                                          |                                                                                                                    |                                                                             |                                                                                      |  |                                               | IPR000742:Epidermal growth factor-like domain |



|   |              |                                      |         |         |            |              |                                                           |                                                                                                    |                                                |  |                                                           |                                                                       |                                                                                       |  |  |                                                                                |
|---|--------------|--------------------------------------|---------|---------|------------|--------------|-----------------------------------------------------------|----------------------------------------------------------------------------------------------------|------------------------------------------------|--|-----------------------------------------------------------|-----------------------------------------------------------------------|---------------------------------------------------------------------------------------|--|--|--------------------------------------------------------------------------------|
| 5 | scaffold 52  | evm.model.scaffold52_cov104.185 EVM  | 1765171 | 1771975 |            | NP_729306    | pebble(pbl)                                               |                                                                                                    | GO:0045792--negative regulation of cell size   |  |                                                           | GO:0090090--negative regulation of canonical Wnt signaling pathway    |                                                                                       |  |  |                                                                                |
| 5 | scaffold 52  | evm.model.scaffold52_cov104.196 EVM  | 1868428 | 1871069 |            | NP_649850    | Ras-related GTP binding A/B ortholog (H. sapiens)(RagA-B) |                                                                                                    | GO:0030307--positive regulation of cell growth |  |                                                           |                                                                       |                                                                                       |  |  | GO:0032008--positive regulation of TOR signaling                               |
| 5 | scaffold 52  | evm.model.scaffold52_cov104.202 EVM  | 1884037 | 1885511 |            | NP_524409    | Heparan sulfate 6-O-sulfotransferase(Hs6st)               |                                                                                                    |                                                |  |                                                           | GO:0060828--regulation of canonical Wnt signaling pathway             |                                                                                       |  |  |                                                                                |
| 5 | scaffold 52  | evm.model.scaffold52_cov104.206 EVM  | 1897893 | 1902579 |            | NP_572930    | Ajuba LIM protein(jub)                                    |                                                                                                    |                                                |  |                                                           |                                                                       |                                                                                       |  |  | GO:0035329--hippo signaling,GO:0035331--negative regulation of hippo signaling |
| 5 | scaffold 52  | evm.model.scaffold52_cov104.216 EVM  | 1932385 | 1952631 |            | NP_524987    | Sulfated(Sulf1)                                           |                                                                                                    |                                                |  |                                                           | GO:0030178--negative regulation of Wnt signaling pathway              | GO:0042059--negative regulation of epidermal growth factor receptor signaling pathway |  |  |                                                                                |
| 5 | scaffold 52  | evm.model.scaffold52_cov104.280 EVM  | 2394439 | 2399680 |            | NP_728307    | CG11940 gene product from transcript CG11940-RB(pico)     |                                                                                                    | GO:0008361--regulation of cell size            |  | GO:0048639--positive regulation of developmental growth   |                                                                       |                                                                                       |  |  |                                                                                |
| 5 | scaffold 52  | evm.model.scaffold52_cov104.282 EVM  | 2420123 | 2445488 |            | NP_001245768 | vielfaltig(vfl)                                           |                                                                                                    |                                                |  | GO:0044719--regulation of imaginal disc-derived wing size |                                                                       |                                                                                       |  |  |                                                                                |
| 5 | scaffold 52  | evm.model.scaffold52_cov104.286 EVM  | 2466428 | 2469269 |            | NP_477087    | Activated Cdc42 kinase-like(Ack-like)                     | GO:0042127--regulation of cell proliferation                                                       |                                                |  |                                                           |                                                                       |                                                                                       |  |  |                                                                                |
| 5 | scaffold 52  | evm.model.scaffold52_cov104.288 EVM  | 2471617 | 2473853 |            | NP_477086    | Activated Cdc42 kinase-like(Ack-like)                     | GO:0042127--regulation of cell proliferation                                                       |                                                |  |                                                           |                                                                       |                                                                                       |  |  |                                                                                |
| 6 | scaffold 216 | evm.model.scaffold216_cov103.3 EVM   | 17386   | 19753   | BL, GM, EL | NP_523498    | Menin 1(Mnn1)                                             | GO:0008285--negative regulation of cell proliferation                                              |                                                |  |                                                           |                                                                       |                                                                                       |  |  |                                                                                |
| 6 | scaffold 224 | evm.model.scaffold224_cov105.2 EVM   | 28687   | 30753   |            | NP_523559    | kekkon-1(kek1)                                            |                                                                                                    |                                                |  |                                                           |                                                                       | GO:0042059--negative regulation of epidermal growth factor receptor signaling pathway |  |  |                                                                                |
| 6 | scaffold 224 | evm.model.scaffold224_cov105.13 EVM  | 158820  | 168788  |            | NP_652731    | Desaturase 1(Desat1)                                      |                                                                                                    | GO:0045793--positive regulation of cell size   |  |                                                           |                                                                       |                                                                                       |  |  |                                                                                |
| 6 | scaffold 224 | evm.model.scaffold224_cov105.21 EVM  | 246334  | 248552  |            | NP_523551    | kekkon-2(kek2)                                            |                                                                                                    |                                                |  |                                                           |                                                                       | GO:0042059--negative regulation of epidermal growth factor receptor signaling pathway |  |  |                                                                                |
| 6 | scaffold 224 | evm.model.scaffold224_cov105.34 EVM  | 461993  | 466436  |            | NP_572988    | pudgy(pdgy)                                               |                                                                                                    |                                                |  |                                                           | GO:0046627--negative regulation of insulin receptor signaling pathway |                                                                                       |  |  |                                                                                |
| 6 | scaffold 224 | evm.model.scaffold224_cov105.35 EVM  | 467347  | 470069  |            | NP_572988    | pudgy(pdgy)                                               |                                                                                                    |                                                |  |                                                           | GO:0046627--negative regulation of insulin receptor signaling pathway |                                                                                       |  |  |                                                                                |
| 6 | scaffold 224 | evm.model.scaffold224_cov105.64 EVM  | 675242  | 682045  | EL         | NP_572988    | pudgy(pdgy)                                               |                                                                                                    |                                                |  |                                                           | GO:0046627--negative regulation of insulin receptor signaling pathway |                                                                                       |  |  |                                                                                |
| 6 | scaffold 224 | evm.model.scaffold224_cov105.66 EVM  | 684479  | 684849  |            | NP_572988    | pudgy(pdgy)                                               |                                                                                                    |                                                |  |                                                           | GO:0046627--negative regulation of insulin receptor signaling pathway |                                                                                       |  |  |                                                                                |
| 6 | scaffold 224 | evm.model.scaffold224_cov105.100 EVM | 1050689 | 1052309 |            | NP_477311    | decapentaplegic(dpp)                                      | GO:0008285--negative regulation of cell proliferation,GO:0042127--regulation of cell proliferation |                                                |  |                                                           |                                                                       |                                                                                       |  |  |                                                                                |

|    |              |                                             |         |         |    |              |                                                                         |                                                                                                                                                            |                                                                                                                    |                                                                                                                                      |                                                                                 |                                                                                                                                                                                                 |                                                                                                    |                                                       |  |                                                          |
|----|--------------|---------------------------------------------|---------|---------|----|--------------|-------------------------------------------------------------------------|------------------------------------------------------------------------------------------------------------------------------------------------------------|--------------------------------------------------------------------------------------------------------------------|--------------------------------------------------------------------------------------------------------------------------------------|---------------------------------------------------------------------------------|-------------------------------------------------------------------------------------------------------------------------------------------------------------------------------------------------|----------------------------------------------------------------------------------------------------|-------------------------------------------------------|--|----------------------------------------------------------|
| 6  | scaffold 224 | evm.model.scaffol<br>d224_cov105.110<br>EVM | 1099063 | 1099531 |    | NP_524741    | Calcineurin B(CanB)                                                     |                                                                                                                                                            |                                                                                                                    |                                                                                                                                      |                                                                                 | dme04310:Wnt<br>signaling pathway                                                                                                                                                               |                                                                                                    |                                                       |  |                                                          |
| 6  | scaffold 224 | evm.model.scaffol<br>d224_cov105.113<br>EVM | 1130323 | 1135449 |    | NP_477311    | decapentaplegic(dpp)                                                    | GO:0008285--negat<br>ive regulation of<br>cell<br>proliferation;GO:00<br>42127--regulation<br>of cell proliferation                                        |                                                                                                                    |                                                                                                                                      |                                                                                 |                                                                                                                                                                                                 |                                                                                                    |                                                       |  |                                                          |
| 6  | scaffold 224 | evm.model.scaffol<br>d224_cov105.154<br>EVM | 1550194 | 1554468 |    | NP_476614    | CG4162 gene product from<br>transcript CG4162-RA(lace)                  |                                                                                                                                                            |                                                                                                                    | GO:0040008--regul<br>ation of growth                                                                                                 |                                                                                 | GO:0030111--regul<br>ation of Wnt<br>signaling pathway                                                                                                                                          |                                                                                                    |                                                       |  |                                                          |
| 6  | scaffold 588 | evm.model.scaffol<br>d588_cov103.27<br>EVM  | 207016  | 211810  | GM | NP_610216    | Brahma associated protein<br>170kD(Bap170)                              |                                                                                                                                                            |                                                                                                                    |                                                                                                                                      |                                                                                 |                                                                                                                                                                                                 | GO:0042059--negat<br>ive regulation of<br>epidermal growth<br>factor receptor<br>signaling pathway |                                                       |  |                                                          |
| 6  | scaffold 588 | evm.model.scaffol<br>d588_cov103.29<br>EVM  | 216377  | 224958  |    | NP_599132    | Syntaxin 5(Syx5)                                                        | GO:0008283--cell<br>proliferation                                                                                                                          |                                                                                                                    |                                                                                                                                      |                                                                                 |                                                                                                                                                                                                 |                                                                                                    |                                                       |  |                                                          |
| 17 | scaffold 54  | evm.model.scaffol<br>d54_cov100.7<br>EVM    | 73663   | 103294  |    | NP_524672    | tribbles(trbl)                                                          |                                                                                                                                                            |                                                                                                                    |                                                                                                                                      | GO:0046627--negat<br>ive regulation of<br>insulin receptor<br>signaling pathway |                                                                                                                                                                                                 |                                                                                                    |                                                       |  |                                                          |
| 17 | scaffold 54  | evm.model.scaffol<br>d54_cov100.26<br>EVM   | 265287  | 269159  |    | NP_476726    | small wing(sl)                                                          |                                                                                                                                                            | GO:0030307--positi<br>ve regulation of cell<br>growth                                                              |                                                                                                                                      |                                                                                 |                                                                                                                                                                                                 | GO:0042059--negat<br>ive regulation of<br>epidermal growth<br>factor receptor<br>signaling pathway |                                                       |  |                                                          |
| 17 | scaffold 54  | evm.model.scaffol<br>d54_cov100.36<br>EVM   | 349828  | 382000  | GM | NP_523705    | off-track(otk)                                                          |                                                                                                                                                            |                                                                                                                    |                                                                                                                                      |                                                                                 | GO:0090090--negat<br>ive regulation of<br>canonical Wnt<br>signaling pathway                                                                                                                    |                                                                                                    |                                                       |  |                                                          |
| 22 | scaffold 59  | evm.model.scaffol<br>d59_cov101.2<br>EVM    | 49321   | 51497   |    | NP_609615    | kekkon4(kek4)                                                           |                                                                                                                                                            |                                                                                                                    |                                                                                                                                      |                                                                                 | GO:0042059--negat<br>ive regulation of<br>epidermal growth<br>factor receptor<br>signaling pathway                                                                                              |                                                                                                    |                                                       |  |                                                          |
| 22 | scaffold 59  | evm.model.scaffol<br>d59_cov101.7<br>EVM    | 97465   | 105629  |    | NP_723540    | CG5686 gene product from<br>transcript CG5686-RB(chico)                 | GO:0008361--regul<br>ation of cell<br>size;GO:0030307--<br>positive regulation<br>of cell<br>growth;GO:004579<br>3--positive<br>regulation of cell<br>size | GO:0035264--multi<br>cellular organism<br>growth;GO:004001<br>4--regulation of<br>multicellular<br>organism growth | GO:0008286--insuli<br>n receptor signaling<br>pathway;GO:00480<br>09--insulin-like<br>growth factor<br>receptor signaling<br>pathway |                                                                                 |                                                                                                                                                                                                 |                                                                                                    |                                                       |  |                                                          |
| 22 | scaffold 59  | evm.model.scaffol<br>d59_cov101.9<br>EVM    | 123761  | 129339  |    | NP_001287034 | charybde(chrb)                                                          |                                                                                                                                                            |                                                                                                                    |                                                                                                                                      | GO:0045926--negat<br>ive regulation of<br>growth                                |                                                                                                                                                                                                 |                                                                                                    |                                                       |  | GO:0032006--regul<br>ation of TOR<br>signaling           |
| 22 | scaffold 59  | evm.model.scaffol<br>d59_cov101.29<br>EVM   | 314157  | 335314  |    | NP_001245407 | CG33978 gene product from<br>transcript CG33978-<br>RD(CG33978)         |                                                                                                                                                            |                                                                                                                    |                                                                                                                                      |                                                                                 |                                                                                                                                                                                                 |                                                                                                    | IPR000742:Epider<br>mal growth factor-<br>like domain |  |                                                          |
| 22 | scaffold 59  | evm.model.scaffol<br>d59_cov101.38<br>EVM   | 488710  | 489579  |    | NP_476725    | seven in absentia(sina)                                                 |                                                                                                                                                            |                                                                                                                    |                                                                                                                                      |                                                                                 | dme04310:Wnt<br>signaling pathway                                                                                                                                                               |                                                                                                    |                                                       |  |                                                          |
| 22 | scaffold 59  | evm.model.scaffol<br>d59_cov101.44<br>EVM   | 573178  | 574154  |    | NP_651887    | CG2245 gene product from<br>transcript CG2245-RA(nero)                  | GO:0008283--cell<br>proliferation                                                                                                                          | GO:0016049--cell<br>growth                                                                                         |                                                                                                                                      |                                                                                 |                                                                                                                                                                                                 |                                                                                                    |                                                       |  |                                                          |
| 22 | scaffold 59  | evm.model.scaffol<br>d59_cov101.47<br>EVM   | 577854  | 578531  |    | NP_647948    | p53-related protein kinase<br>ortholog(Prpk)                            |                                                                                                                                                            | GO:0030307--positi<br>ve regulation of cell<br>growth                                                              | GO:0040018--positi<br>ve regulation of<br>multicellular<br>organism growth                                                           |                                                                                 |                                                                                                                                                                                                 |                                                                                                    |                                                       |  | GO:0032008--positi<br>ve regulation of<br>TOR signaling, |
| 22 | scaffold 59  | evm.model.scaffol<br>d59_cov101.90<br>EVM   | 1139083 | 1141903 | HL | NP_722830    | Hepatocyte growth factor<br>regulated tyrosine kinase<br>substrate(Hrs) |                                                                                                                                                            |                                                                                                                    |                                                                                                                                      |                                                                                 | GO:0042058--regul<br>ation of epidermal<br>growth factor<br>receptor signaling<br>pathway;GO:00420<br>59--negative<br>regulation of<br>epidermal growth<br>factor receptor<br>signaling pathway |                                                                                                    |                                                       |  |                                                          |
| 22 | scaffold 59  | evm.model.scaffol<br>d59_cov101.94<br>EVM   | 1188837 | 1195321 | HL | NP_523779    | SMAD specific E3 ubiquitin<br>protein ligase(Smurf)                     |                                                                                                                                                            |                                                                                                                    |                                                                                                                                      | GO:0040008--regul<br>ation of growth                                            |                                                                                                                                                                                                 |                                                                                                    |                                                       |  |                                                          |

|    |              |                                     |         |         |    |              |                                                          |                                                                                   |                                                                                |                                                                                   |                                                                                                                        |                                                                                                                    |                                                               |                                  |                                                                                          |  |  |  |                                                               |                         |
|----|--------------|-------------------------------------|---------|---------|----|--------------|----------------------------------------------------------|-----------------------------------------------------------------------------------|--------------------------------------------------------------------------------|-----------------------------------------------------------------------------------|------------------------------------------------------------------------------------------------------------------------|--------------------------------------------------------------------------------------------------------------------|---------------------------------------------------------------|----------------------------------|------------------------------------------------------------------------------------------|--|--|--|---------------------------------------------------------------|-------------------------|
| 22 | scaffold 59  | evm.model.scaffold59_cov101.117 EVM | 1413588 | 1424101 | HL | NP_524155    | frizzled 2(fz2)                                          |                                                                                   |                                                                                |                                                                                   |                                                                                                                        |                                                                                                                    |                                                               |                                  |                                                                                          |  |  |  | GO:0016055-Wnt signaling pathway                              |                         |
| 22 | scaffold 59  | evm.model.scaffold59_cov101.120 EVM | 1431745 | 1435762 |    | NP_476708    | RNA polymerase I 135kD subunit(Rp1135)                   |                                                                                   |                                                                                | GO:0016049-cell growth,GO:0045793-positive regulation of cell size                |                                                                                                                        |                                                                                                                    |                                                               |                                  |                                                                                          |  |  |  |                                                               |                         |
| 22 | scaffold 59  | evm.model.scaffold59_cov101.122 EVM | 1441196 | 1459710 |    | NP_001259803 | split ends(spen)                                         |                                                                                   |                                                                                |                                                                                   |                                                                                                                        |                                                                                                                    | GO:0007173-epidermal growth factor receptor signaling pathway |                                  | GO:0016055-Wnt signaling pathway,GO:0030177-positive regulation of Wnt signaling pathway |  |  |  |                                                               |                         |
| 22 | scaffold 59  | evm.model.scaffold59_cov101.127 EVM | 1553691 | 1555025 |    | NP_477295    | CG8846 gene product from transcript CG8846-RA(Thor)      |                                                                                   |                                                                                | GO:0001558-regulation of cell growth,GO:0045792-negative regulation of cell size, |                                                                                                                        |                                                                                                                    |                                                               |                                  |                                                                                          |  |  |  |                                                               |                         |
| 22 | scaffold 59  | evm.model.scaffold59_cov101.144 EVM | 1810536 | 1817119 |    | NP_001097582 | CG32082 gene product from transcript CG32082-RA(CG32082) |                                                                                   |                                                                                |                                                                                   |                                                                                                                        | GO:0008286-insulin receptor signaling pathway                                                                      |                                                               |                                  |                                                                                          |  |  |  |                                                               |                         |
| 22 | scaffold 59  | evm.model.scaffold59_cov101.155 EVM | 1955335 | 1960510 |    | NP_001096855 | Rho GTPase activating protein at 1A(RhoGAPIA)            |                                                                                   |                                                                                | GO:0045792-negative regulation of cell size                                       |                                                                                                                        |                                                                                                                    |                                                               |                                  |                                                                                          |  |  |  |                                                               |                         |
| 22 | scaffold 59  | evm.model.scaffold59_cov101.182 EVM | 2293153 | 2295652 |    | NP_648927    | sina homologue(sinah)                                    |                                                                                   |                                                                                |                                                                                   |                                                                                                                        |                                                                                                                    |                                                               |                                  |                                                                                          |  |  |  | dme04310:Wnt signaling pathway                                |                         |
| 22 | scaffold 59  | evm.model.scaffold59_cov101.196 EVM | 2427154 | 2437467 |    | NP_723541    | basket(bsk)                                              |                                                                                   |                                                                                |                                                                                   |                                                                                                                        |                                                                                                                    |                                                               |                                  |                                                                                          |  |  |  | GO:0016055-Wnt signaling pathway                              | Hippo signaling pathway |
| 22 | scaffold 59  | evm.model.scaffold59_cov101.199 EVM | 2494696 | 2496185 |    | NP_477424    | Phosphatase and tensin homolog(Pten)                     | GO:0008283-cell proliferation,GO:008285-negative regulation of cell proliferation | GO:0008361-regulation of cell size,GO:0045792-negative regulation of cell size |                                                                                   | GO:0040014-regulation of multicellular organism growth,GO:0040015-negative regulation of multicellular organism growth | GO:0008286-insulin receptor signaling pathway,GO:0046627-negative regulation of insulin receptor signaling pathway |                                                               |                                  |                                                                                          |  |  |  |                                                               |                         |
| 22 | scaffold 59  | evm.model.scaffold59_cov101.219 EVM | 2758996 | 2759514 |    | NP_724946    | longitudinals lacking(lola)                              |                                                                                   |                                                                                |                                                                                   | GO:0044719-regulation of imaginal disc-derived wing size                                                               |                                                                                                                    |                                                               |                                  |                                                                                          |  |  |  |                                                               |                         |
| 22 | scaffold 59  | evm.model.scaffold59_cov101.221 EVM | 2774258 | 2782358 |    | NP_477243    | crooked legs(crol)                                       |                                                                                   |                                                                                |                                                                                   |                                                                                                                        |                                                                                                                    |                                                               |                                  |                                                                                          |  |  |  | GO:0030178-negative regulation of Wnt signaling pathway       |                         |
| 22 | scaffold 59  | evm.model.scaffold59_cov101.222 EVM | 2801125 | 2802356 |    | NP_788320    | longitudinals lacking(lola)                              |                                                                                   |                                                                                |                                                                                   | GO:0044719-regulation of imaginal disc-derived wing size                                                               |                                                                                                                    |                                                               |                                  |                                                                                          |  |  |  |                                                               |                         |
| 22 | scaffold 59  | evm.model.scaffold59_cov101.261 EVM | 3191848 | 3194889 |    | NP_524020    | haywire(hay)                                             | GO:0042127-regulation of cell proliferation                                       |                                                                                |                                                                                   |                                                                                                                        | GO:0040008-regulation of growth                                                                                    |                                                               |                                  |                                                                                          |  |  |  |                                                               |                         |
| X  | scaffold 341 | evm.model.scaffold341_cov52.31 EVM  | 337899  | 338449  |    | NP_612045    | CG3402 gene product from transcript CG3402-RA(CG3402)    |                                                                                   |                                                                                |                                                                                   |                                                                                                                        |                                                                                                                    | GO:0030111-regulation of Wnt signaling pathway                |                                  |                                                                                          |  |  |  |                                                               |                         |
| X  | scaffold 341 | evm.model.scaffold341_cov52.40 EVM  | 437841  | 440152  |    | NP_001036454 | conundrum(conu)                                          | 0008284-positive regulation of cell proliferation                                 |                                                                                |                                                                                   |                                                                                                                        |                                                                                                                    |                                                               |                                  |                                                                                          |  |  |  |                                                               |                         |
| X  | scaffold 341 | evm.model.scaffold341_cov52.59 EVM  | 578706  | 584012  | EW | NP_524392    | CG7467 gene product from transcript CG7467-RE(osa)       |                                                                                   |                                                                                |                                                                                   |                                                                                                                        |                                                                                                                    |                                                               | GO:0016055-Wnt signaling pathway | GO:0042058-regulation of epidermal growth factor receptor signaling pathway              |  |  |  |                                                               |                         |
| X  | scaffold 341 | evm.model.scaffold341_cov52.60 EVM  | 585710  | 596078  |    | NP_996228    | CG7467 gene product from transcript CG7467-RE(osa)       |                                                                                   |                                                                                |                                                                                   |                                                                                                                        |                                                                                                                    |                                                               | GO:0016055-Wnt signaling pathway | GO:0042058-regulation of epidermal growth factor receptor signaling pathway              |  |  |  |                                                               |                         |
| X  | scaffold 341 | evm.model.scaffold341_cov52.66 EVM  | 676019  | 678849  |    | NP_524683    | SHC-adaptor protein(Shc)                                 |                                                                                   |                                                                                |                                                                                   |                                                                                                                        |                                                                                                                    |                                                               |                                  |                                                                                          |  |  |  | GO:0007173-epidermal growth factor receptor signaling pathway |                         |

|   |              |                                       |        |        |    |              |                                                        |                                                      |                                             |  |  |  |                                                                                                     |                                                         |                                  |  |  |                                               |                                                                                      |  |
|---|--------------|---------------------------------------|--------|--------|----|--------------|--------------------------------------------------------|------------------------------------------------------|---------------------------------------------|--|--|--|-----------------------------------------------------------------------------------------------------|---------------------------------------------------------|----------------------------------|--|--|-----------------------------------------------|--------------------------------------------------------------------------------------|--|
| X | scaffold 341 | evm.model.scaffold341_cov52.74<br>EVM | 779941 | 789292 |    | NP_476618    | CG7123 gene product from transcript CG7123-RA(LanB1)   |                                                      |                                             |  |  |  |                                                                                                     |                                                         |                                  |  |  | IPR000742:Epidermal growth factor-like domain |                                                                                      |  |
| X | scaffold 644 | evm.model.scaffold644_cov53.2<br>EVM  | 2869   | 6143   |    | NP_648489    | RIO kinase 1(RIOK1)                                    |                                                      |                                             |  |  |  | GO:0040018-positive regulation of multicellular organism growth                                     |                                                         |                                  |  |  |                                               |                                                                                      |  |
| X | scaffold 644 | evm.model.scaffold644_cov53.9<br>EVM  | 30375  | 35177  |    | NP_524812    | frizzled(Fz)                                           |                                                      |                                             |  |  |  |                                                                                                     |                                                         | GO:0016055-Wnt signaling pathway |  |  |                                               |                                                                                      |  |
| X | scaffold 644 | evm.model.scaffold644_cov53.15<br>EVM | 67125  | 71120  |    | NP_996208    | Kinesin family member 19A ortholog(Kif19A)             |                                                      |                                             |  |  |  | GO:0008286-insulin receptor signaling pathway                                                       |                                                         |                                  |  |  |                                               |                                                                                      |  |
| X | scaffold 644 | evm.model.scaffold644_cov53.16<br>EVM | 74637  | 83104  |    | NP_524343    | CG9829 gene product from transcript CG9829-RB(poly)    |                                                      |                                             |  |  |  | GO:0008286-insulin receptor signaling pathway                                                       |                                                         |                                  |  |  |                                               |                                                                                      |  |
| X | scaffold 644 | evm.model.scaffold644_cov53.53<br>EVM | 310075 | 312143 |    | NP_524177    | gigas(gig)                                             | GO:0008285-negative regulation of cell proliferation | GO:0045792-negative regulation of cell size |  |  |  | GO:0046627-negative regulation of insulin receptor signaling pathway                                | GO:0030178-negative regulation of Wnt signaling pathway |                                  |  |  |                                               |                                                                                      |  |
| X | scaffold 644 | evm.model.scaffold644_cov53.58<br>EVM | 378231 | 384398 |    | NP_001188729 | dachs(d)                                               |                                                      |                                             |  |  |  | GO:0045927-positive regulation of growth;<br>GO:0045572-positive regulation of imaginal disc growth |                                                         |                                  |  |  |                                               | dme04391:Hippo signaling pathway                                                     |  |
| X | scaffold 644 | evm.model.scaffold644_cov53.81<br>EVM | 592402 | 596492 | EW | NP_612113    | cueball(cue)                                           |                                                      |                                             |  |  |  |                                                                                                     |                                                         |                                  |  |  |                                               | IPR000742:Epidermal growth factor-like domain                                        |  |
| X | scaffold 644 | evm.model.scaffold644_cov53.85<br>EVM | 647197 | 656310 |    | NP_523876    | extra macrochaetae(emc)                                | GO:0008283-cell proliferation                        |                                             |  |  |  |                                                                                                     |                                                         |                                  |  |  |                                               |                                                                                      |  |
| X | scaffold 644 | evm.model.scaffold644_cov53.94<br>EVM | 753850 | 754691 |    | NP_610218    | CG3183 gene product from transcript CG3183-RA(geminin) |                                                      |                                             |  |  |  |                                                                                                     |                                                         |                                  |  |  |                                               | GO:0042059-negative regulation of epidermal growth factor receptor signaling pathway |  |
